# Supplementary material for: Genomic Epidemiology of the Haitian Cholera Outbreak: a Single Introduction Followed by Rapid, Extensive, and Continued Spread Characterized the Onset of the Epidemic
Source: PubMed Central journal article supplement — mBio. 2014 Nov 4;5(6):e01721-14. doi: 10.1128/mBio.01721-14 (PMC4222100; doi:10.1128/mbio.01721-14), 2014-11-04
Supplement: mbo006142052sf7.pdf [file mbo006142052sf7.pdf]

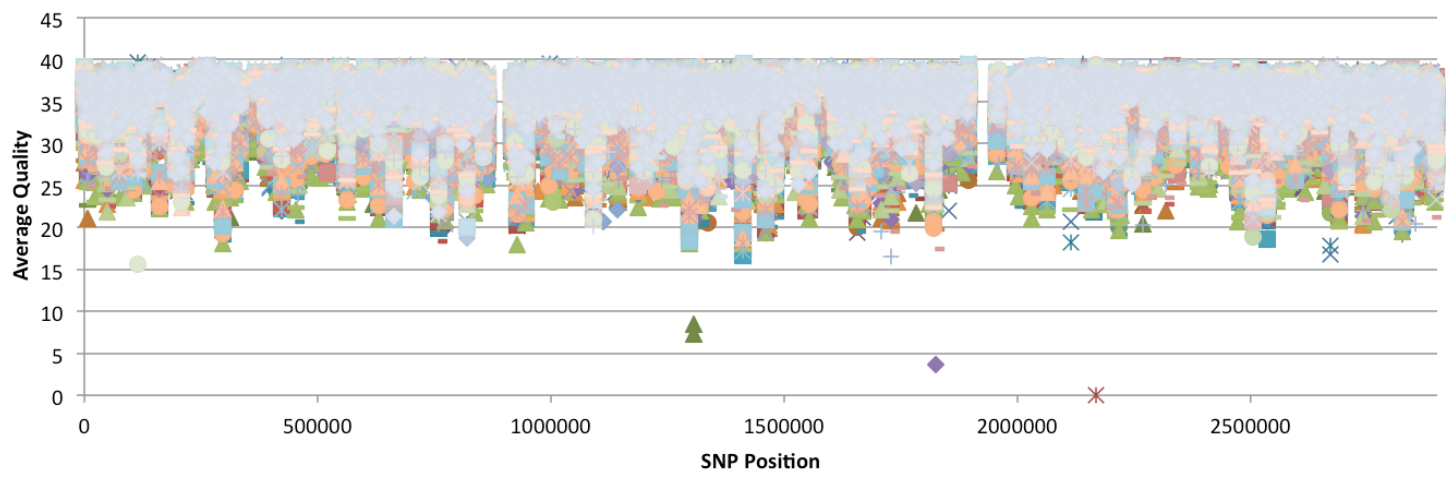

- CP1032   ▲ CP1033   ✕ NEP21113   ✕ HC61A1   ● HC50A2   + CP1048   - CP1041   - CP1050   ◆ NEP21106   ■ EC0027   ▲ HC39A1   ✕ HC43A1   ✕ HC48B2   ● NHCC010F   + EM1546
- HC37A1   ■ HC41A1   ◆ HCUF01   ■ PCS023   ▲ HC48A1   ✕ HC70A1   ✕ HC71A1   ● HC80A1   + CP1042   - EC0009   - HC40A1   ◆ HC49A2   ■ NHCC006C   ▲ HC42A1   ✕ HC64A1
- ✕ HC67A1   ● HC81A1   + EDC020   - HC68A1   - HC6A1   ◆ NHCC004A   ■ EM1536   ▲ HC17A1   ✕ HC28A1   ✕ HC33A2   ● HC38A1   + HC46A1   - HC47A1   - HC77A1   ◆ HC57A2
- HC65A1   ▲ HC22A1   ✕ HC7A1   ✕ HC19A1   ● HC20A2   + HC21A1   - HC32A1   - EDC022   ◆ CP1038   ■ HC23A1   ▲ CP1040   ✕ EM1626   ✕ EC0051   ● 116059   + CP1044
- CP1030   - CP1047   ◆ CP1046   ■ EC0012   ▲ EM1727   ✕ HCFU2   ✕ PCS022   ● VC10   + VC11   - VC12   - VC13   ◆ VC14   ■ VC15   ▲ VC16   ✕ VC17
- ✕ VC18   ● VC19   + VC2   - VC20   - VC21   ◆ VC22   ■ VC25   ▲ VC26   ✕ VC3   ✕ VC4   ● VC5   + VC6   - VC7   - VC8   ◆ VC9

**A**

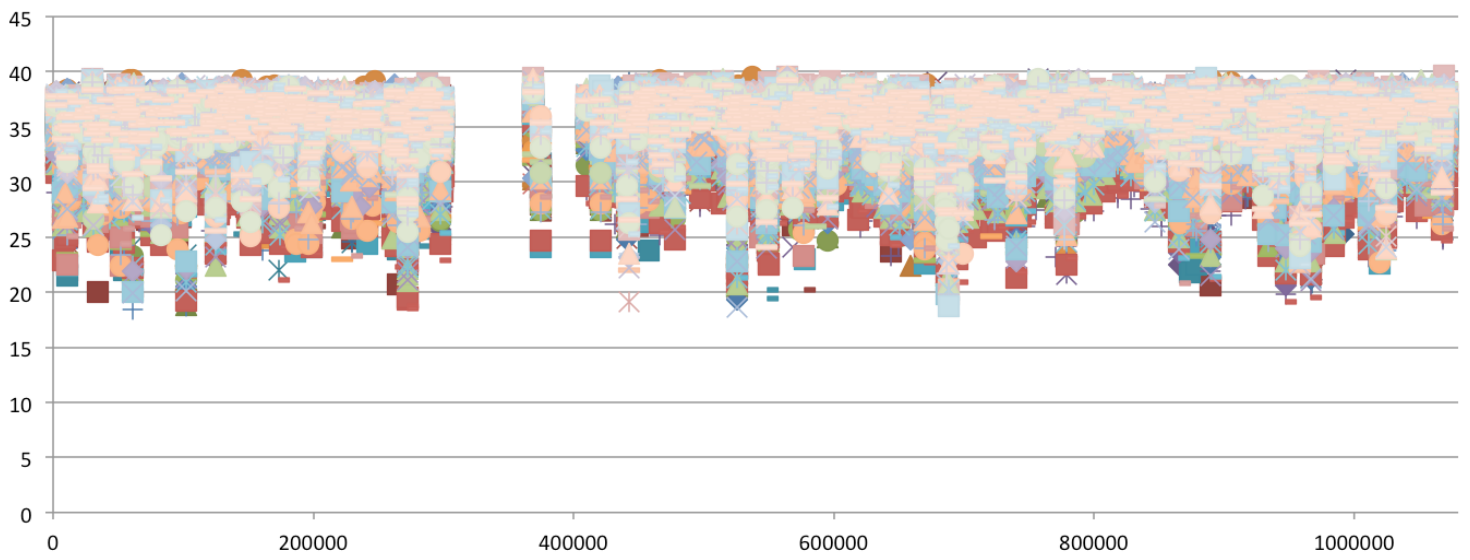

- ◆ CP1032   ■ CP1033   ▲ NEP21113   ✕ HC61A1   ✕ HC50A2   ● CP1048   + CP1041   - CP1050   - NEP21106   ◆ EC0027   ■ HC39A1   ▲ HC43A1   ✕ HC48B2   ● NHCC010F   ● EM1546
- + HC37A1   - HC41A1   - HCUF01   ◆ PCS023   ■ HC48A1   ▲ HC70A1   ✕ HC71A1   ✕ HC80A1   ● CP1042   + EC0009   - HC40A1   - HC49A2   ◆ NHCC006C   ■ HC42A1   ▲ HC64A1
- ✕ HC67A1   ✕ HC81A1   ● EDC020   + HC68A1   - HC6A1   - NHCC004A   ◆ EM1536   ■ HC17A1   ▲ HC28A1   ✕ HC33A2   ✕ HC38A1   ● HC46A1   + HC47A1   - HC77A1   - HC57A2
- ◆ HC65A1   ■ HC22A1   ▲ HC7A1   ✕ HC19A1   ✕ HC20A2   ● HC21A1   + HC32A1   - EDC022   - CP1038   ◆ HC23A1   ■ CP1040   ▲ EM1626   ✕ EC0051   ✕ 116059   ● CP1044
- + CP1030   - CP1047   - CP1046   ◆ EC0012   ■ EM1727   ▲ HCFU2   ✕ PCS022   ✕ VC10   ● VC11   + VC12   - VC13   - VC14   ◆ VC15   ■ VC16   ▲ VC17
- ✕ VC18   ✕ VC19   ● VC2   + VC20   - VC21   - VC22   ◆ VC25   ■ VC26   ▲ VC3   ✕ VC4   ✕ VC5   ● VC6   + VC7   - VC8   - VC9

**B**
