# Supplementary material for: Genomic Epidemiology of the Haitian Cholera Outbreak: a Single Introduction Followed by Rapid, Extensive, and Continued Spread Characterized the Onset of the Epidemic
Source: PubMed Central journal article supplement — mBio. 2014 Nov 4;5(6):e01721-14. doi: 10.1128/mBio.01721-14 (PMC4222100; doi:10.1128/mbio.01721-14), 2014-11-04
Supplement: mbo006142052st1.pdf [file mbo006142052st1.pdf]

Table S1

|    | Strain      | Serotype | Biotype                   | Geographical Origin                                   | Source   | Year | Genome   | Sequencing technology | Map       | Reference              | SRA / assembly accession        |
|----|-------------|----------|---------------------------|-------------------------------------------------------|----------|------|----------|-----------------------|-----------|------------------------|---------------------------------|
| 1  | VC14        | O1       | OGET group 4              | Nepal, Banke district, Nepalgunj municipality, ward 5 | Clinical | 2010 | draft    | Illumina              | x         | Hendriksen et al, 2011 | SRX082939 / NA                  |
| 2  | VC26        | O1       | OGET group 4              | Nepal, Rupandehi district, Butawal municipality       | Clinical | 2010 | draft    | Illumina              | x         | Hendriksen et al, 2011 | SRX082949 / NA                  |
| 3  | VC25        | O1       | OGET group 4              | Nepal, Rupandehi district, Butawal municipality       | Clinical | 2010 | draft    | Illumina              |           | Hendriksen et al, 2011 | SRX082948 / NA                  |
| 4  | HC43A1      | O1       | OGET                      | Haiti, Delmas, Port-au-Prince, Ouest                  | Clinical | 2010 | draft    | 454, Illumina         | x         | Hasan et al, 2012      | SRA030737 / AGUQ00000000        |
| 5  | HC23A1      | O1       | OGET                      | Haiti, Bassin-Bleu, Port-de-Paix, Nord-Ouest          | Clinical | 2010 | draft    | 454, Illumina         | x         | Hasan et al, 2012      | SRA030719 / AGMU00000000        |
| 6  | HC19A1      | O1       | OGET                      | Haiti, Saint-Marc, Saint-Marc, Artibonite             | Clinical | 2010 | draft    | Illumina              |           | Hasan et al, 2012      | SRA035994 / AGUJ00000000        |
| 7  | HC7A1       | O1       | OGET                      | Haiti, Grande Saline, Dessalines, Artibonite          | Clinical | 2010 | draft    | 454, Illumina         | x         | Hasan et al, 2012      | SRX059355 / AGVA00000000.2      |
| 8  | HC22A1      | O1       | OGET                      | Haiti, Saint-Marc, Saint-Marc, Artibonite             | Clinical | 2010 | draft    | Illumina              |           | Hasan et al, 2012      | SRA035991 / AGUL00000000        |
| 9  | HC46A1      | O1       | OGET                      | Haiti, Port-au-Prince, Port-au-Prince, Ouest          | Clinical | 2010 | draft    | 454, Illumina         | x         | N/A                    | SRA037285 / ALDQ00000000        |
| 10 | HC28A1      | O1       | OGET                      | Haiti, En Plein, Gonaïves, Ouest                      | Clinical | 2010 | draft    | Illumina              |           | Hasan et al, 2012      | SRA035987 / AGUN00000000        |
| 11 | HC17A1      | O1       | OGET                      | Haiti, Gonaïves, Gonaïves, Artibonite                 | Clinical | 2010 | draft    | Illumina              |           | Hasan et al, 2012      | SRA046087 / AJRN00000000        |
| 12 | HC6A1       | O1       | OGET                      | Haiti, Saint-Marc, Saint-Marc, Artibonite             | Clinical | 2010 | draft    | Illumina              |           | Hasan et al, 2012      | SRX059318 / AGUI00000000.1      |
| 13 | HC80A1      | O1       | OGET                      | Haiti, Cite Soleil, Port-au-Prince, Ouest             | Clinical | 2010 | draft    | Illumina              |           | Hasan et al, 2012      | SRA035982 / AGVB00000000        |
| 14 | HC41A1      | O1       | OGET                      | Haiti                                                 | Clinical | 2010 | draft    | Illumina              |           | N/A                    | SRA037370 / ALDN00000000        |
| 15 | HC40A1      | O1       | OGET                      | Haiti, Arcahaie, Arcahaie, Ouest                      | Clinical | 2010 | draft    | Illumina              |           | Hasan et al, 2012      | SRA030718 / AFOK00000000        |
| 16 | HC32A1      | O1       | OGET                      | Haiti, Cite Soleil, Port-au-Prince, Ouest             | Clinical | 2010 | draft    | Illumina              |           | Hasan et al, 2012      | SRA035998 / AGUO00000000        |
| 17 | HC21A1      | O1       | OGET                      | Haiti, Saint-Marc, Saint-Marc, Artibonite             | Clinical | 2010 | draft    | Illumina              |           | Hasan et al, 2012      | SRA035997 / AGUK00000000        |
| 18 | HC20A2      | O1       | OGET                      | Haiti, Saint-Marc, Saint-Marc, Artibonite             | Clinical | 2010 | draft    | 454, Illumina         | x         | N/A                    | SRA035992 / ALDL00000000        |
| 19 | HC42A1      | O1       | OGET                      | Haiti, Cite Soleil, Port-au-Prince, Ouest             | Clinical | 2010 | draft    | Illumina              |           | N/A                    | SRA037384 / ALDO00000000        |
| 20 | 2010EL1786  | O1       | OG                        | Haiti                                                 | Clinical | 2010 | complete | PacBio                | in silico | Ceccarelli et al, 2011 | SRX031665 / CP003069 / CP003070 |
| 21 | 2010EL1798  | O1       | OG                        | Haiti                                                 | Clinical | 2010 | draft    | PacBio                |           | Ceccarelli et al, 2011 | SRX032202 / AELI01000000.1      |
| 22 | 2010EL1792  | O1       | OG                        | Haiti                                                 | Clinical | 2010 | draft    | PacBio                |           | Ceccarelli et al, 2011 | SRX032204 / AELJ00000000.1      |
| 23 | HC48A1      | O1       | OGET                      | Haiti, Tabarre, Port-au-Prince, Ouest                 | Clinical | 2010 | draft    | Illumina              |           | Hasan et al, 2012      | SRA030742 / AFOL00000000        |
| 24 | HC38A1      | O1       | OGET                      | Haiti, Croix-des-Bouquets, Croix-des-Bouquets, Ouest  | Clinical | 2010 | draft    | 454, Illumina         |           | Hasan et al, 2012      | SRA030739 / AFOV01000000        |
| 25 | HFU02       | O1       | OGET                      | Saint-Marc, Artibonite, Haiti                         | Clinical | 2010 | draft    | Illumina              |           | N/A                    | SRA030741 / AFOS00000000        |
| 26 | 2011V1021   | O1       | OG (ctxB7)                | Dominican Republic                                    | Clinical | 2011 | draft    | 454, Illumina         |           | Reimer et al, 2012     | SRX249662 / AHGK00000000.1      |
| 27 | 2011EL1089  | O1       | OG (ctxB7)                | Haiti                                                 | Clinical | 2010 | draft    | 454, Illumina         |           | Reimer et al, 2012     | SRX249468 / AHGH00000000.1      |
| 28 | 2010EL2010N | O1       | OG (ctxB7, non-hemolytic) | Haiti                                                 | Clinical | 2010 | draft    | 454, Illumina         |           | Reimer et al, 2012     | SRX249466 / AHGF00000000.1      |
| 29 | 2010EL2010H | O1       | OG (ctxB7, hemolytic)     | Haiti                                                 | Clinical | 2010 | draft    | 454, Illumina         |           | Reimer et al, 2012     | SRX249465 / AHGE00000000.1      |
| 30 | 2010EL1961  | O1       | OG (ctxB7)                | Haiti                                                 | Clinical | 2010 | draft    | 454, Illumina         |           | Reimer et al, 2012     | SRX249464 / AHGD00000000.1      |
| 31 | HC65A1      | O1       | OGET                      | Haiti, Tabarre, Port-au-Prince, Ouest                 | Clinical | 2010 | draft    | Illumina              |           | Hasan et al, 2012      | SRA035971 / AGUU00000000        |
| 32 | HC57A2      | O1       | OGET                      | Haiti, Tabarre, Port-au-Prince, Ouest                 | Clinical | 2010 | draft    | Illumina              |           | N/A                    | SRA037372 / ALDZ00000000        |
| 33 | HC77A1      | O1       | OGET                      | Haiti, Plaine, Gonaïves, Ouest                        | Clinical | 2010 | draft    | Illumina              |           | Hasan et al, 2012      | SRA046088 / AJRW00000000        |
| 34 | HC47A1      | O1       | OGET                      | Haiti, Tabarre, Port-au-Prince, Ouest                 | Clinical | 2010 | draft    | Illumina              |           | N/A                    | SRA037385 / ALDR00000000        |
| 35 | HC33A2      | O1       | OGET                      | Haiti, Tabarre, Port-au-Prince, Ouest                 | Clinical | 2010 | draft    | Illumina              |           | Hasan et al, 2012      | SRA035995 / AGUP00000000        |
| 36 | HC68A1      | O1       | OGET                      | Haiti, Port-au-Prince, Port-au-Prince, Ouest          | Clinical | 2010 | draft    | Illumina              |           | Hasan et al, 2012      | SRA035984 / AGUW00000000        |
| 37 | HC81A1      | O1       | OGET                      | Haiti, Cite Soleil, Port-au-Prince, Ouest             | Clinical | 2010 | draft    | 454, Illumina         | x         | Hasan et al, 2012      | SRA035973 / AGVC00000000        |

|    |            |    |                     |                                                           |             |      |       |               |   |                        |                            |
|----|------------|----|---------------------|-----------------------------------------------------------|-------------|------|-------|---------------|---|------------------------|----------------------------|
| 38 | HC67A1     | O1 | OGET                | Haiti, Port-au-Prince, Port-au-Prince, Ouest              | Clinical    | 2010 | draft | Illumina      |   | Hasan et al, 2012      | SRA035983 / AGUV00000000   |
| 39 | HC64A1     | O1 | OGET                | Haiti, Port-au-Prince, Port-au-Prince, Ouest              | Clinical    | 2010 | draft | Illumina      |   | Hasan et al, 2012      | SRA035979 / AGUT00000000   |
| 40 | HC49A2     | O1 | OGET                | Haiti, Port-au-Prince, Port-au-Prince, Ouest              | Clinical    | 2010 | draft | 454, Illumina | x | Hasan et al, 2012      | SRA030717 / AFOM00000000   |
| 41 | HC71A1     | O1 | OGET                | Haiti, Port-au-Prince, Port-au-Prince, Ouest              | Clinical    | 2010 | draft | Illumina      |   | Hasan et al, 2012      | SRA035981 / AGUX00000000   |
| 42 | HC70A1     | O1 | OGET                | Haiti, Montrouis City, Ouest                              | Clinical    | 2010 | draft | Illumina      |   | N/A                    | SRA030740 / AFON00000000   |
| 43 | HCUF01     | O1 | OGET                | Saint-Marc, Artibonite, Haiti                             | Clinical    | 2010 | draft | 454, Illumina | x | Hasan et al, 2012      | SRA030713 / AFOO00000000   |
| 44 | HC37A1     | O1 | OGET                | Haiti, En Plein, Gonaïves, Ouest                          | Clinical    | 2010 | draft | Illumina      |   | N/A                    | SRA047986 / AJSJ00000000   |
| 45 | HC48B2     | O1 | OGET                | Haiti, Tabarre, Port-au-Prince, Ouest                     | Clinical    | 2010 | draft | Illumina      |   | Hasan et al, 2012      | SRA035993 / AGUR00000000   |
| 46 | HC39A1     | O1 | OGET                | Haiti, Port-au-Prince, Port-au-Prince, Ouest              | Clinical    | 2010 | draft | Illumina      |   | N/A                    | SRA037383 / ALDM00000000   |
| 47 | HC50A2     | O1 | OGET                | Haiti, Port-au-Prince, Port-au-Prince, Ouest              | Clinical    | 2010 | draft | Illumina      |   | Hasan et al, 2012      | SRA046626 / AJRQ00000000   |
| 48 | HC61A1     | O1 | OGET                | Haiti, Croix-des-Bouquets, Croix-des-Bouquets, Ouest      | Clinical    | 2010 | draft | 454, Illumina | x | Hasan et al, 2012      | SRA030716 / AGUS00000000   |
| 49 | 2009V1085  | O1 | OG (ctxB7)          | India, Sri Lanka                                          | Clinical    | 2009 | draft | 454, Illumina |   | Reimer et al, 2012     | SRX249422 / AHFY00000000.1 |
| 50 | 2010EL1749 | O1 | OG (ctxB7)          | Africa, Cameroon                                          | Clinical    | 2010 | draft | 454, Illumina |   | Reimer et al, 2012     | SRX249463 / AHGC00000000.1 |
| 51 | 2009V1096  | O1 | OG (ctxB7)          | India                                                     | Clinical    | 2009 | draft | 454, Illumina |   | Reimer et al, 2012     | SRX249431 / AHFZ00000000.1 |
| 52 | VC15       | O1 | OGET group 3        | Nepal, Dang Deokhuri district, Narayanpur VDC, ward 5     | Clinical    | 2010 | draft | Illumina      |   | Hendriksen et al, 2011 | SRX082940 / NA             |
| 53 | VC18       | O1 | OGET group 3        | Nepal, Banke district, Nepalgunj municipality             | Clinical    | 2010 | draft | Illumina      | x | Hendriksen et al, 2011 | SRX082943 / NA             |
| 54 | EC0027     | O1 | OGET                | Bangladesh, Chhatak                                       | Environment | 2010 | draft | Illumina      |   | N/A                    | SRA052156/ APFR00000000    |
| 55 | EC0012     | O1 | OGET                | Bangladesh, Chhatak                                       | Environment | 2010 | draft | Illumina      |   | N/A                    | SRA052663/ APFQ00000000    |
| 56 | NHCC006C   | O1 | OGET                | Bangladesh, Chhatak                                       | Clinical    | 2010 | draft | Illumina      |   | N/A                    | SRA052150/ APGB00000000    |
| 57 | EC0009     | O1 | OGET                | Bangladesh, Chhatak                                       | Environment | 2010 | draft | Illumina      |   | N/A                    | SRA052149/ APFP00000000    |
| 58 | PCS023     | O1 | OGET                | Bangladesh, Dhaka                                         | Clinical    | 2010 | draft | Illumina      |   | N/A                    | SRA052148/ APGG00000000    |
| 59 | NHCC010F   | O1 | OGET                | Bangladesh, Chhatak                                       | Clinical    | 2010 | draft | Illumina      |   | N/A                    | SRA052154/ APGD00000000    |
| 60 | CP1048     | O1 | OGET Altered EI Tor | Bangladesh, Dhaka                                         | Clinical    | 2010 | draft | 454, Illumina | x | Hasan et al, 2012      | SRA037369/ ALDJ00000000    |
| 61 | NHCC004A   | O1 | OGET                | Bangladesh, Chhatak                                       | Clinical    | 2010 | draft | Illumina      |   | N/A                    | SRA052098/ APGA00000000    |
| 62 | EM1546     | O1 | OGET                | Bangladesh, Mathbaria                                     | Environment | 2010 | draft | Illumina      |   | N/A                    | SRA052137/ APFW00000000    |
| 63 | CP1050     | O1 | OGET Altered EI Tor | Bangladesh, Dhaka                                         | Clinical    | 2010 | draft | Illumina      |   | N/A                    | SRA037393/ ALDK00000000    |
| 64 | EDC020     | O1 | OGET                | Bangladesh, Dhaka                                         | Environment | 2010 | draft | Illumina      |   | N/A                    | SRA052157/ APFT00000000    |
| 65 | VC19       | O1 | OGET group 2        | Nepal, Kathmandu district, Kathmandu city                 | Clinical    | 2010 | draft | Illumina      |   | Hendriksen et al, 2011 | SRX082944 / NA             |
| 66 | VC6        | O1 | OGET group 2        | Nepal, Banke district, Nepalgunj municipality, ward 4 1/8 | Clinical    | 2010 | draft | Illumina      | x | Hendriksen et al, 2011 | SRX082837 / NA             |
| 67 | 2009V1131  | O1 | OG (ctxB7)          | India                                                     | Clinical    | 2009 | draft | 454, Illumina |   | Reimer et al, 2012     | SRX249462 / AHGB00000000.1 |
| 68 | 355408     | O1 | OG (ctxB7)          | Nepal                                                     | Clinical    | 2008 | draft | 454, Illumina |   | Reimer et al, 2012     | SRX249691 / AHGN00000000.1 |
| 69 | 2009V1046  | O1 | OG (ctxB1)          | Pakistan                                                  | Clinical    | 2009 | draft | 454, Illumina |   | Reimer et al, 2012     | SRX249421 / AHFX00000000.1 |
| 70 | 2010V1014  | O1 | OG (ctxB1)          | Pakistan                                                  | Clinical    | 2010 | draft | 454, Illumina |   | Reimer et al, 2012     | SRX249467 / AHGG00000000.1 |
| 71 | 2009V1116  | O1 | OG (ctxB1)          | Pakistan                                                  | Clinical    | 2009 | draft | 454, Illumina |   | Reimer et al, 2012     | SRX249461 / AHGA00000000.1 |
| 72 | CP1038     | O1 | OGET                | Africa, Zimbabwe                                          | Clinical    | 2009 | draft | 454, Illumina | x | Hasan et al, 2012      | SRA037375/ ALDC00000000    |
| 73 | 2011EL1137 | O1 | OG (ctxB1)          | Africa, Zimbabwe                                          | Clinical    | 2009 | draft | 454, Illumina |   | Reimer et al, 2012     | SRX249661 / AHGJ00000000.1 |
| 74 | 358205     | O1 | IN (ctxB1)          | Pakistan                                                  | Clinical    | 2005 | draft | 454, Illumina |   | Reimer et al, 2012     | SRX249692 / AHGP00000000.1 |
| 75 | 350005     | O1 | IN (ctxB1)          | India                                                     | Clinical    | 2005 | draft | 454, Illumina |   | Reimer et al, 2012     | SRX249663 / AHGL00000000.1 |
| 76 | 354606     | O1 | IN (ctxB1)          | India                                                     | Clinical    | 2006 | draft | 454, Illumina |   | Reimer et al, 2012     | SRX249690 / AHGM00000000.1 |

|     |          |    |                                   |                                                        |             |      |                          |               |   |                        |                                |
|-----|----------|----|-----------------------------------|--------------------------------------------------------|-------------|------|--------------------------|---------------|---|------------------------|--------------------------------|
| 77  | CIRS101  | O1 | IN (ctxB1) altered El Tor biotype | Bangladesh, Dhaka                                      | Clinical    | 2002 | complete (I), draft (II) | Sanger, 454   |   | Grim et al, 2010       | NA / ACVW0000000.1             |
| 78  | VC2      | O1 | OGET group 1                      | Nepal, Banke district, Nepalgunj municipality          | Clinical    | 2010 | draft                    | Illumina      |   | Hendriksen et al, 2011 | SRX082833 / NA                 |
| 79  | VC8      | O1 | OGET group 1                      | Nepal, Banke district, Nepalgunj municipality, ward 5  | Clinical    | 2010 | draft                    | Illumina      |   | Hendriksen et al, 2011 | SRX082839 / NA                 |
| 80  | VC7      | O1 | OGET group 1                      | Nepal, Banke district, Nepalgunj municipality, ward 6  | Clinical    | 2010 | draft                    | Illumina      |   | Hendriksen et al, 2011 | SRX082838 / NA                 |
| 81  | VC4      | O1 | OGET group 1                      | Nepal, Banke district, Nepalgunj municipality, ward 4  | Clinical    | 2010 | draft                    | Illumina      |   | Hendriksen et al, 2011 | SRX082835 NA                   |
| 82  | VC1      | O1 | OGET group 1                      | Nepal, Banke district, Nepalgunj municipality          | Clinical    | 2010 | draft                    | Illumina      |   | Hendriksen et al, 2011 | SRX082797 / NA                 |
| 83  | VC9      | O1 | OGET group 1                      | Nepal, Banke district, Nepalgunj municipality, ward 4  | Clinical    | 2010 | draft                    | Illumina      |   | Hendriksen et al, 2011 | SRX082840 / NA                 |
| 84  | VC5      | O1 | OGET group 1                      | Nepal, Banke district, Nepalgunj municipality, ward 5  | Clinical    | 2010 | draft                    | Illumina      |   | Hendriksen et al, 2011 | SRX082836 / NA                 |
| 85  | VC3      | O1 | OGET group 1                      | Nepal, Banke district, Nepalgunj municipality, ward 5  | Clinical    | 2010 | draft                    | Illumina      |   | Hendriksen et al, 2011 | SRX082834 / NA                 |
| 86  | VC22     | O1 | OGET group 1                      | Nepal, Rupandehi district, Butawal municipality        | Clinical    | 2010 | draft                    | Illumina      |   | Hendriksen et al, 2011 | SRX082947 / NA                 |
| 87  | VC21     | O1 | OGET group 1                      | Nepal, Rupandehi district, Butawal municipality        | Clinical    | 2010 | draft                    | Illumina      |   | Hendriksen et al, 2011 | SRX082946 / NA                 |
| 88  | VC20     | O1 | OGET group 1                      | Nepal, Banke district, Nepalgunj municipality, ward 12 | Clinical    | 2010 | draft                    | Illumina      |   | Hendriksen et al, 2011 | SRX082945 / NA                 |
| 89  | VC17     | O1 | OGET group 1                      | Nepal, Banke district, Nepalgunj municipality          | Clinical    | 2010 | draft                    | Illumina      |   | Hendriksen et al, 2011 | SRX082942 / NA                 |
| 90  | VC16     | O1 | OGET group 1                      | Nepal, Banke district, Nepalgunj municipality, ward 6  | Clinical    | 2010 | draft                    | Illumina      |   | Hendriksen et al, 2011 | SRX082941 / NA                 |
| 91  | VC13     | O1 | OGET group 1                      | Nepal, Banke district, Nepalgunj municipality, ward 8  | Clinical    | 2010 | draft                    | Illumina      |   | Hendriksen et al, 2011 | SRX082938 / NA                 |
| 92  | VC12     | O1 | OGET group 1                      | Nepal, Dang Deokhuri district, Narayanpur VDC, ward 7  | Clinical    | 2010 | draft                    | Illumina      |   | Hendriksen et al, 2011 | SRX082843 / NA                 |
| 93  | VC11     | O1 | OGET group 1                      | Nepal, Kailali district, Dhangadhi                     | Clinical    | 2010 | draft                    | Illumina      |   | Hendriksen et al, 2011 | SRX082842 / NA                 |
| 94  | VC10     | O1 | OGET group 1                      | Nepal, Banke district, Nepalgunj municipality, ward 12 | Clinical    | 2010 | draft                    | Illumina      |   | Hendriksen et al, 2011 | SRX082841 / NA                 |
| 95  | EM1536   | O1 | OGET                              | Bangladesh, Mathbaria                                  | Environment | 2010 | draft                    | Illumina      |   | N/A                    | SRA052121/ APFV00000000        |
| 96  | EDC022   | O1 | OGET                              | Bangladesh, Dhaka                                      | Environment | 2010 | draft                    | Illumina      |   | N/A                    | SRA052155/ APFU00000000        |
| 97  | PCS022   | O1 | OGET                              | Bangladesh, Dhaka                                      | Clinical    | 2010 | draft                    | Illumina      |   | N/A                    | SRX147079 / JDTE0000000.1      |
| 98  | EM1626   | O1 | OGET                              | Bangladesh, Mathbaria                                  | Environment | 2011 | draft                    | Illumina      |   | N/A                    | SRA052134/ APFX00000000        |
| 99  | CP1042   | O1 | OGET                              | Asia, Thailand                                         | Clinical    | 2010 | draft                    | 454, Illumina | x | Hasan et al, 2012      | SRA037382/ ALDF00000000        |
| 100 | Nep21113 | O1 | OGET                              | Nepal                                                  | Clinical    | 2003 | draft                    | Illumina      |   | N/A                    | SRA052151/ APGF00000000        |
| 101 | Nep21106 | O1 | OGET                              | Nepal                                                  | Clinical    | 2003 | draft                    | Illumina      |   | N/A                    | SRA052152/ APGE00000000        |
| 102 | CP1041   | O1 | OGET                              | Africa, Zambia                                         | Clinical    | 2004 | draft                    | 454, Illumina | X | Hasan et al, 2012      | SRA037374/ ALDE00000000        |
| 103 | CP1040   | O1 | OGET                              | Africa, Zambia                                         | Clinical    | 2004 | draft                    | Illumina      |   | N/A                    | SRA037373/ ALDD00000000        |
| 104 | CP1032   | O1 | OGET Altered El Tor               | Mexico                                                 | Clinical    | 1991 | draft                    | 454, Illumina | x | Hasan et al, 2012      | SRA037376/ ALDA00000000        |
| 105 | CP1033   | O1 | OGET Altered El Tor               | Mexico                                                 | Clinical    | 2000 | draft                    | 454, Illumina | x | N/A                    | SRA046627/ AJRL00000000        |
| 106 | B33      | O1 | OG                                | Africa, Mozambique, Beira                              | Clinical    | 2004 | draft                    | Sanger, 454   |   | Grim et al, 2010       | NA / ACHZ0000000.1             |
| 107 | RC9      | O1 | OG                                | Africa, Kenya                                          | Clinical    | 1985 | draft                    | unknown       |   | N/A                    | NA / ACHX0000000.1             |
| 108 | N16961   | O1 | INET (ctxB3)                      | Bangladesh                                             | Clinical    | 1971 | complete                 | Sanger        |   | Heidelberg et al, 2000 | SRX172839 / AE003852, AE003853 |
| 109 | CP1047   | O1 | OGET                              | South America, Peru                                    | Clinical    | 1995 | draft                    | Illumina      |   | N/A                    | SRA052141/ ALDI00000000        |

|     |        |    |            |                       |             |      |       |               |                  |                    |                            |
|-----|--------|----|------------|-----------------------|-------------|------|-------|---------------|------------------|--------------------|----------------------------|
| 110 | CP1046 | O1 | OGET       | South America, Peru   | Clinical    | 1995 | draft | 454, Illumina | whole genome map | N/A                | SRA037377/<br>ALDH00000000 |
| 111 | CP1044 | O1 | OGET       | South America, Peru   | Clinical    | 1991 | draft | Illumina      |                  | N/A                | SRA037394/<br>ALDG00000000 |
| 112 | EC0051 | O1 | OGET       | Bangladesh, Chhatak   | Environment | 2011 | draft | Illumina      |                  | N/A                | SRA052135/<br>APFS00000000 |
| 113 | EM1727 | O1 | OGET       | Bangladesh, Mathbaria | Environment | 2011 | draft | Illumina      |                  | N/A                | SRA052662/<br>APFZ00000000 |
| 114 | 116059 | O1 | O1         | South America, Brazil | Clinical    | 1992 | draft | Illumina      |                  | N/A                | SRA052141/ APFJ00000000    |
| 115 | CP1030 | O1 | INET       | Mexico                | Clinical    | 2008 | draft | Illumina      |                  | N/A                | SRA037380/<br>ALCZ01000000 |
| 116 | C6706  | O1 | IN (ctxB3) | South America, Peru   | Clinical    | 1991 | draft | 454, Illumina |                  | Reimer et al, 2012 | NA / AHGQ00000000.1        |
