# Supplementary figures and images for: Genomic Epidemiology of the Haitian Cholera Outbreak: a Single Introduction Followed by Rapid, Extensive, and Continued Spread Characterized the Onset of the Epidemic
Source: PubMed Central journal article supplement — mBio. 2014 Nov 4;5(6):e01721-14. doi: 10.1128/mBio.01721-14 (PMC4222100; doi:10.1128/mbio.01721-14), 2014-11-04

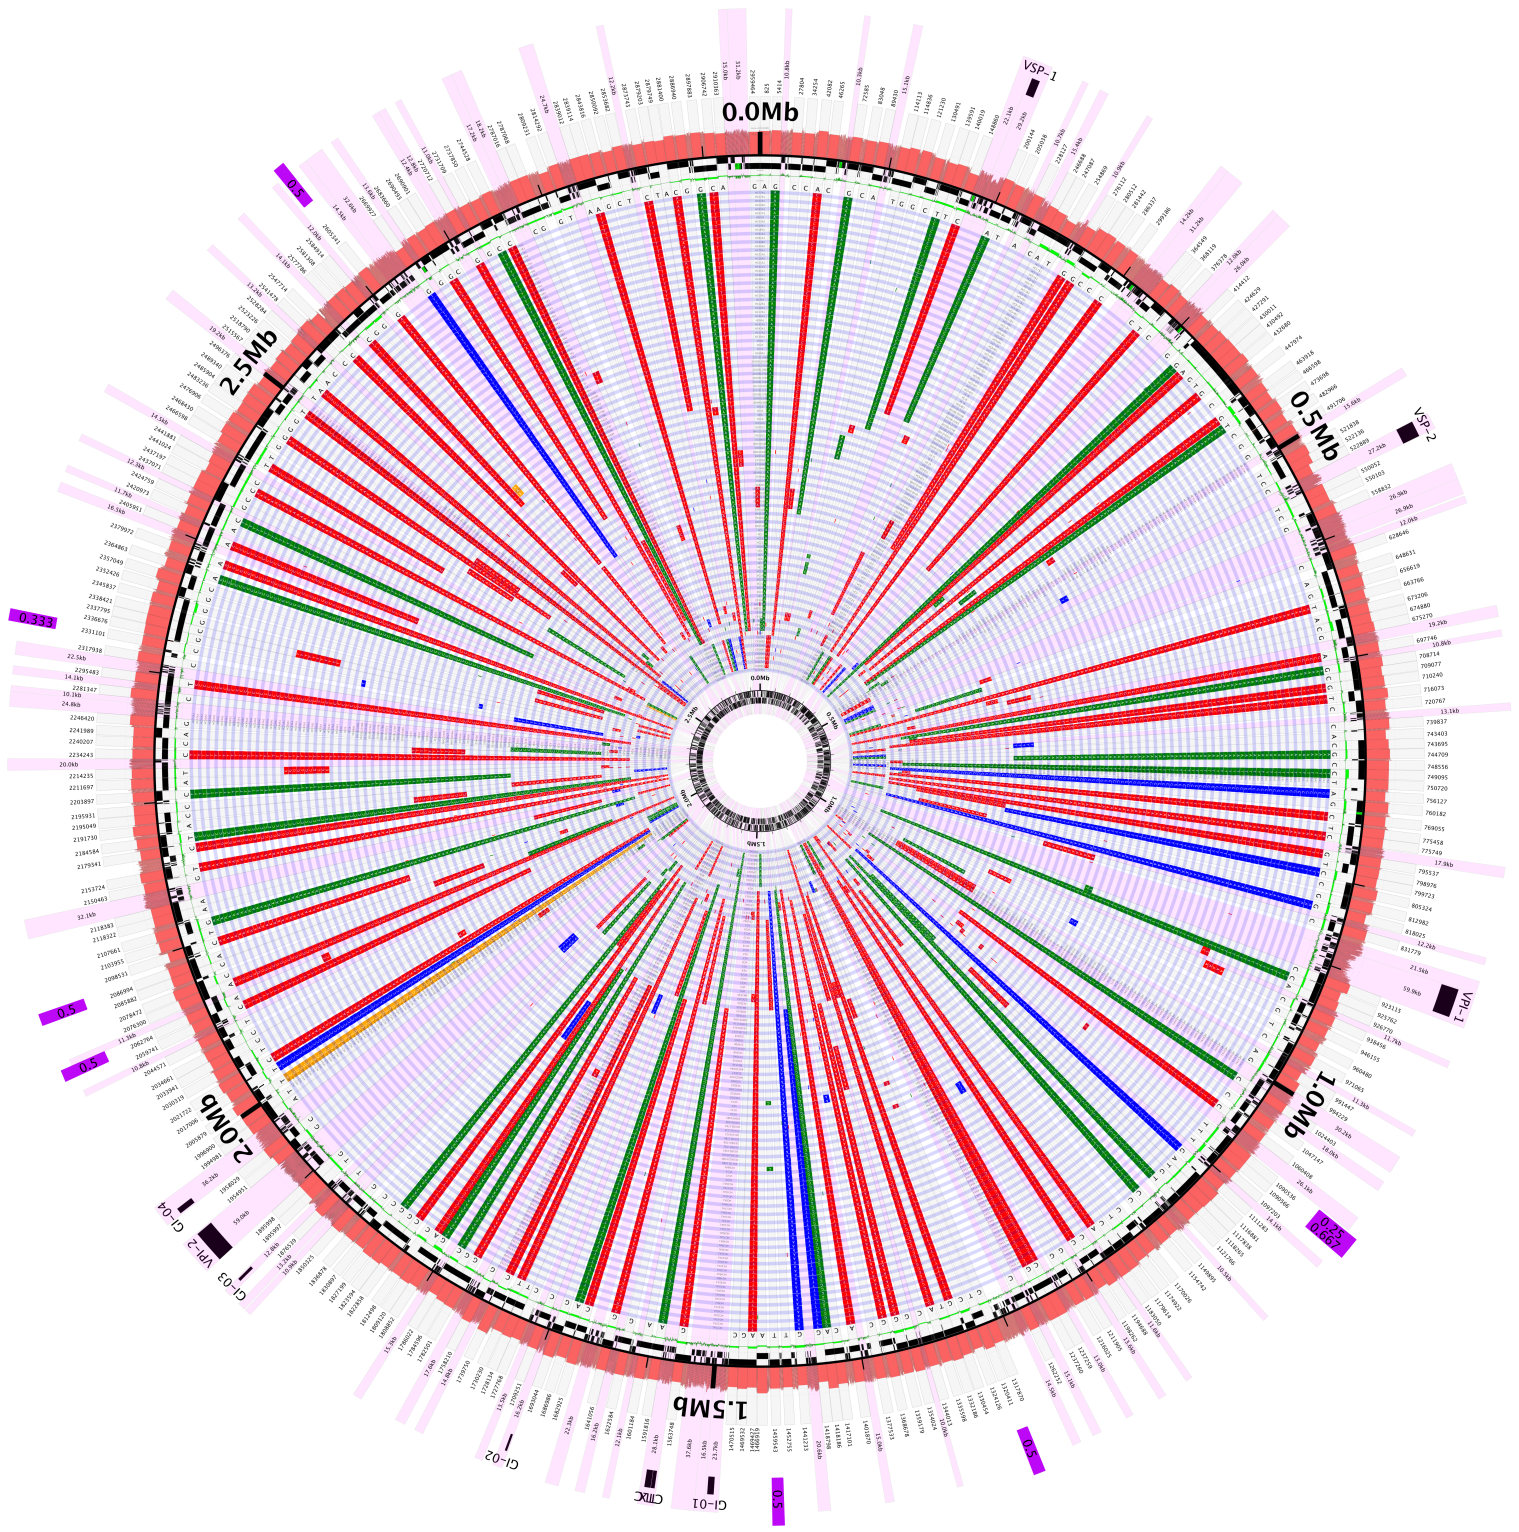

Supplement: mbo006142052sf1.pdf [file mbo006142052sf1.pdf]

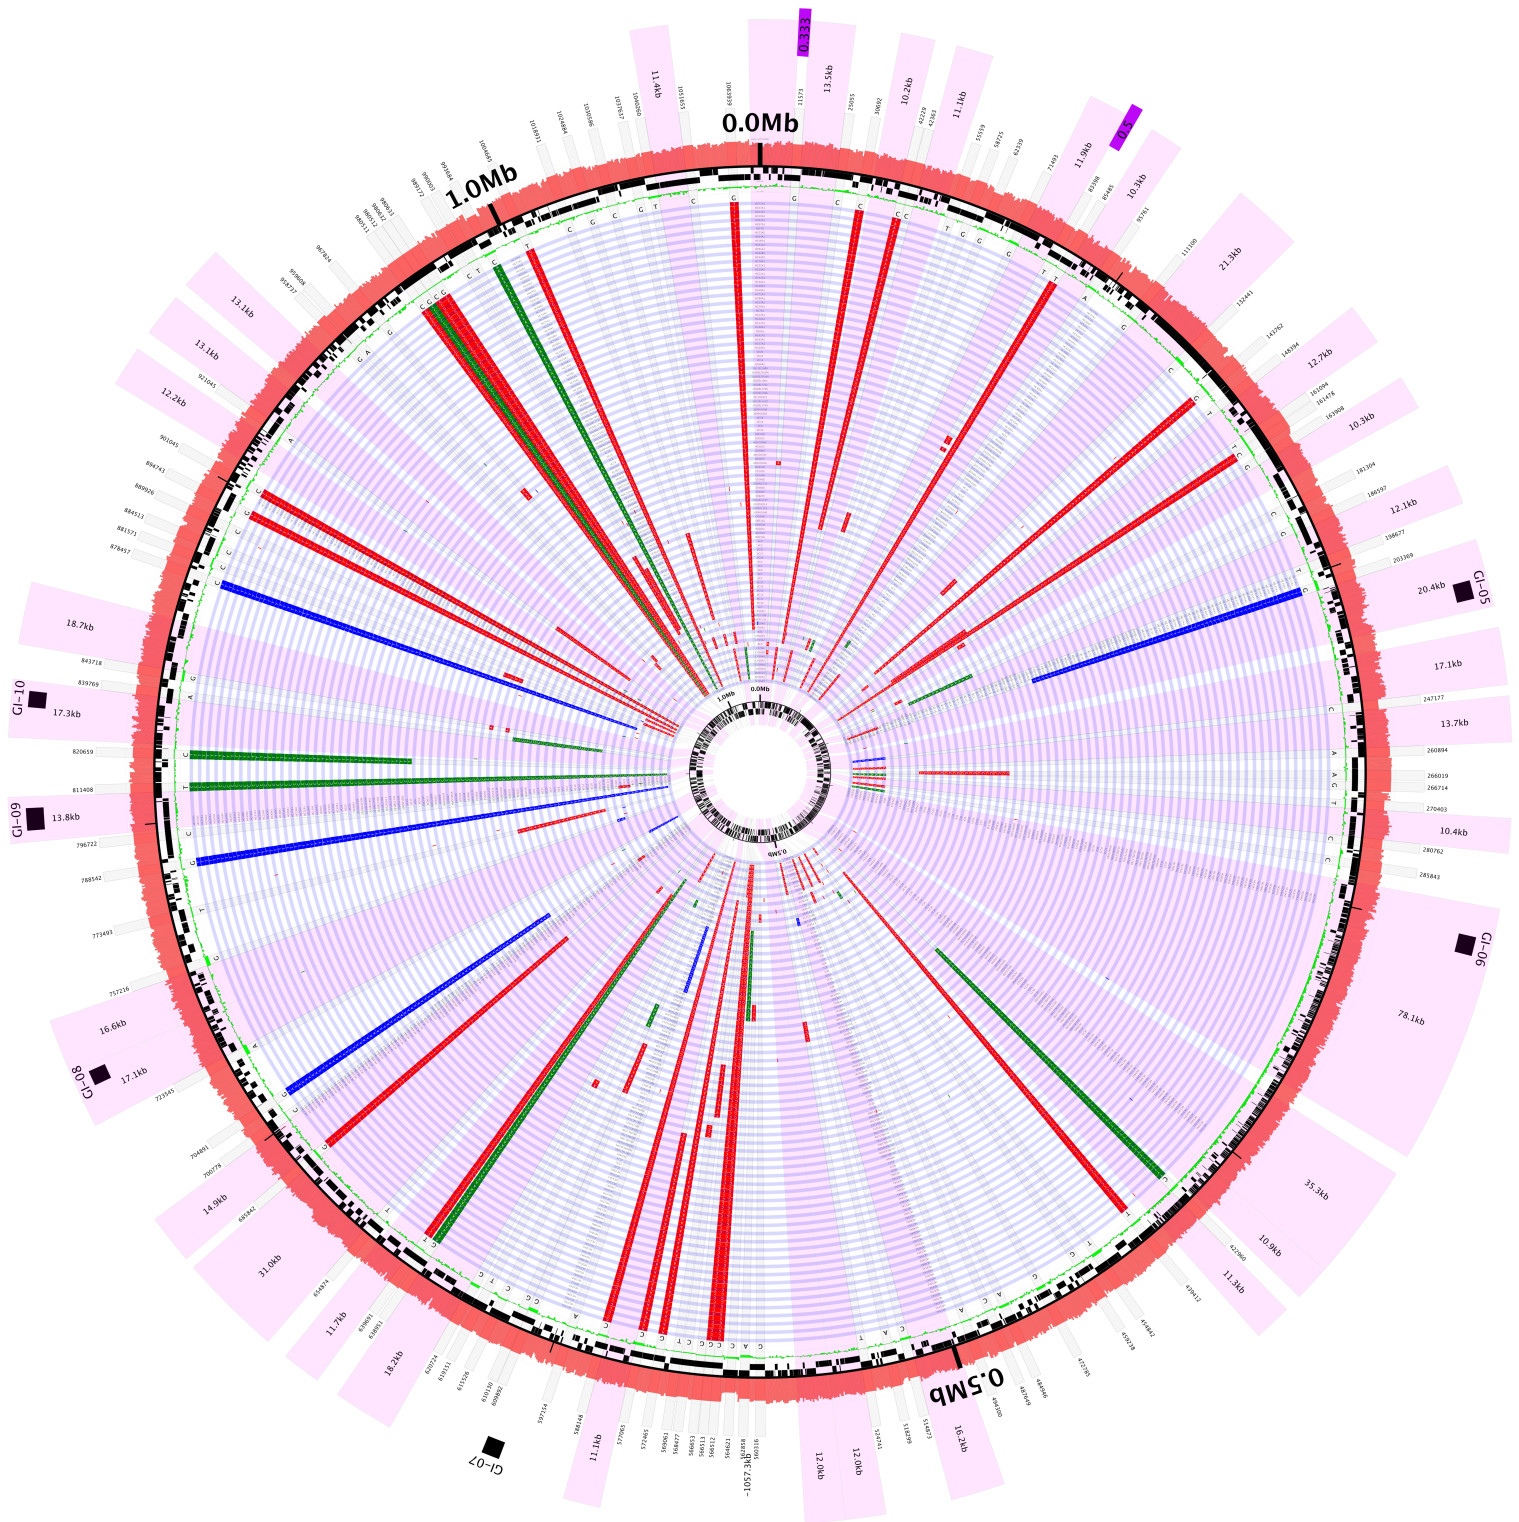

Supplement: mbo006142052sf2.pdf [file mbo006142052sf2.pdf]

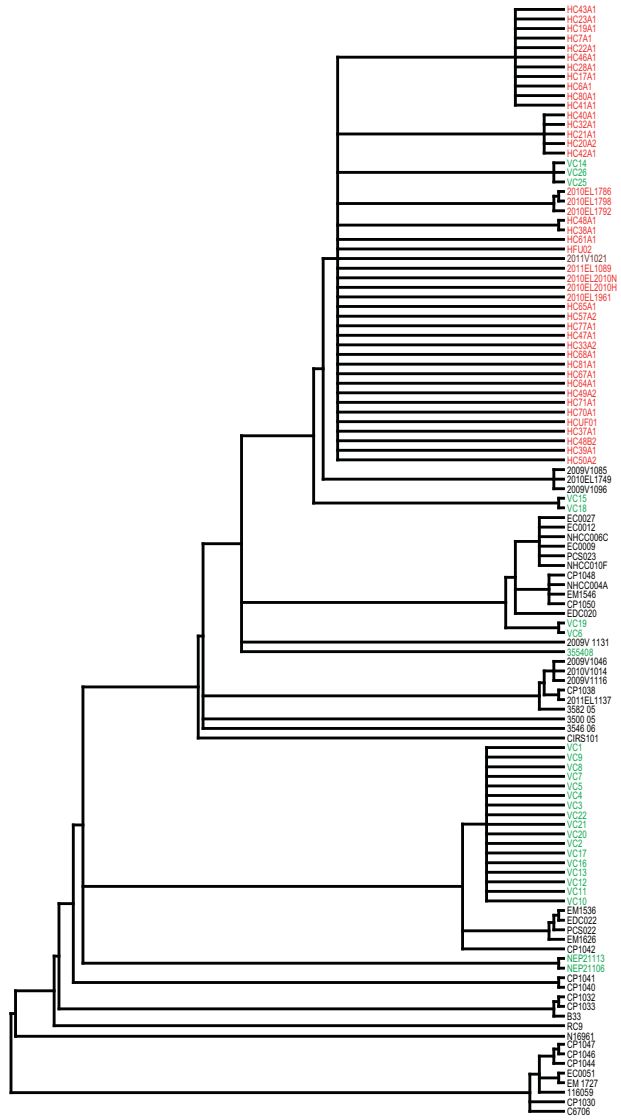

Supplement: mbo006142052sf3.pdf [file mbo006142052sf3.pdf]

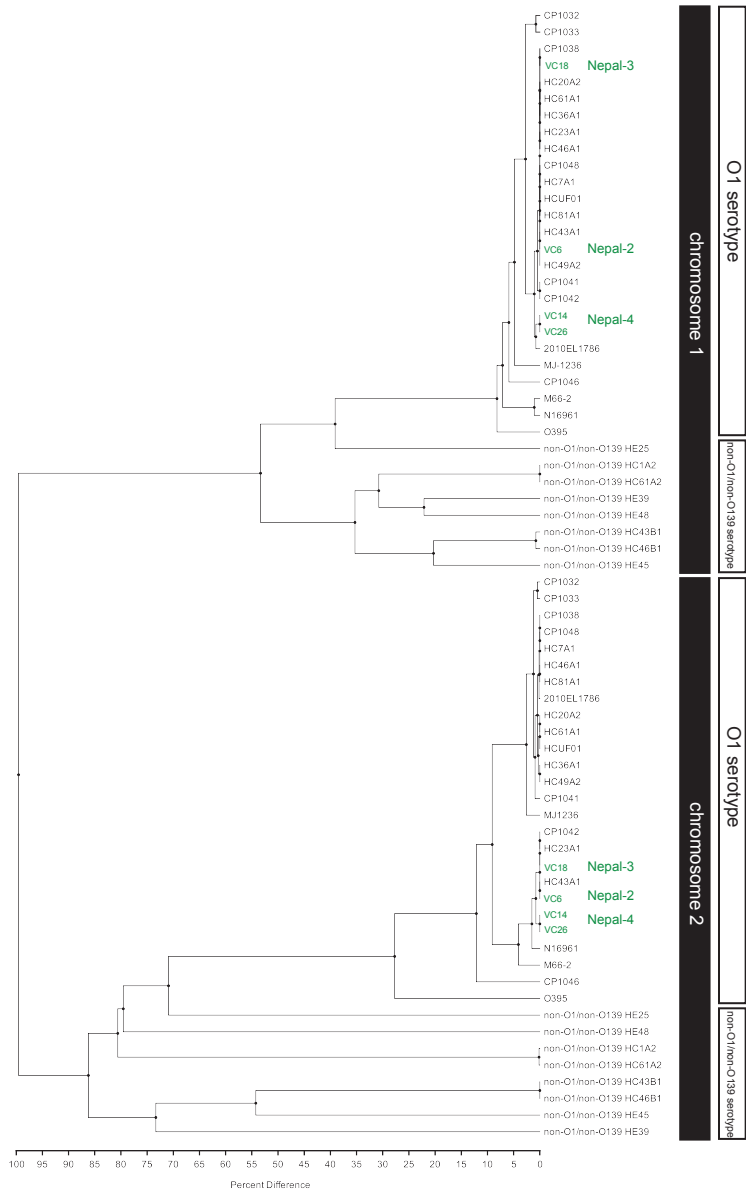

Supplement: mbo006142052sf4.pdf [file mbo006142052sf4.pdf]

**Figure S5****A**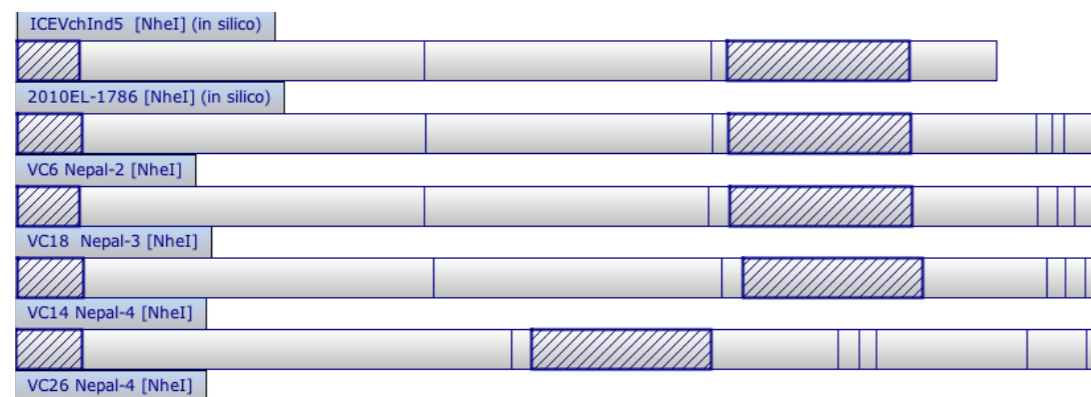**B**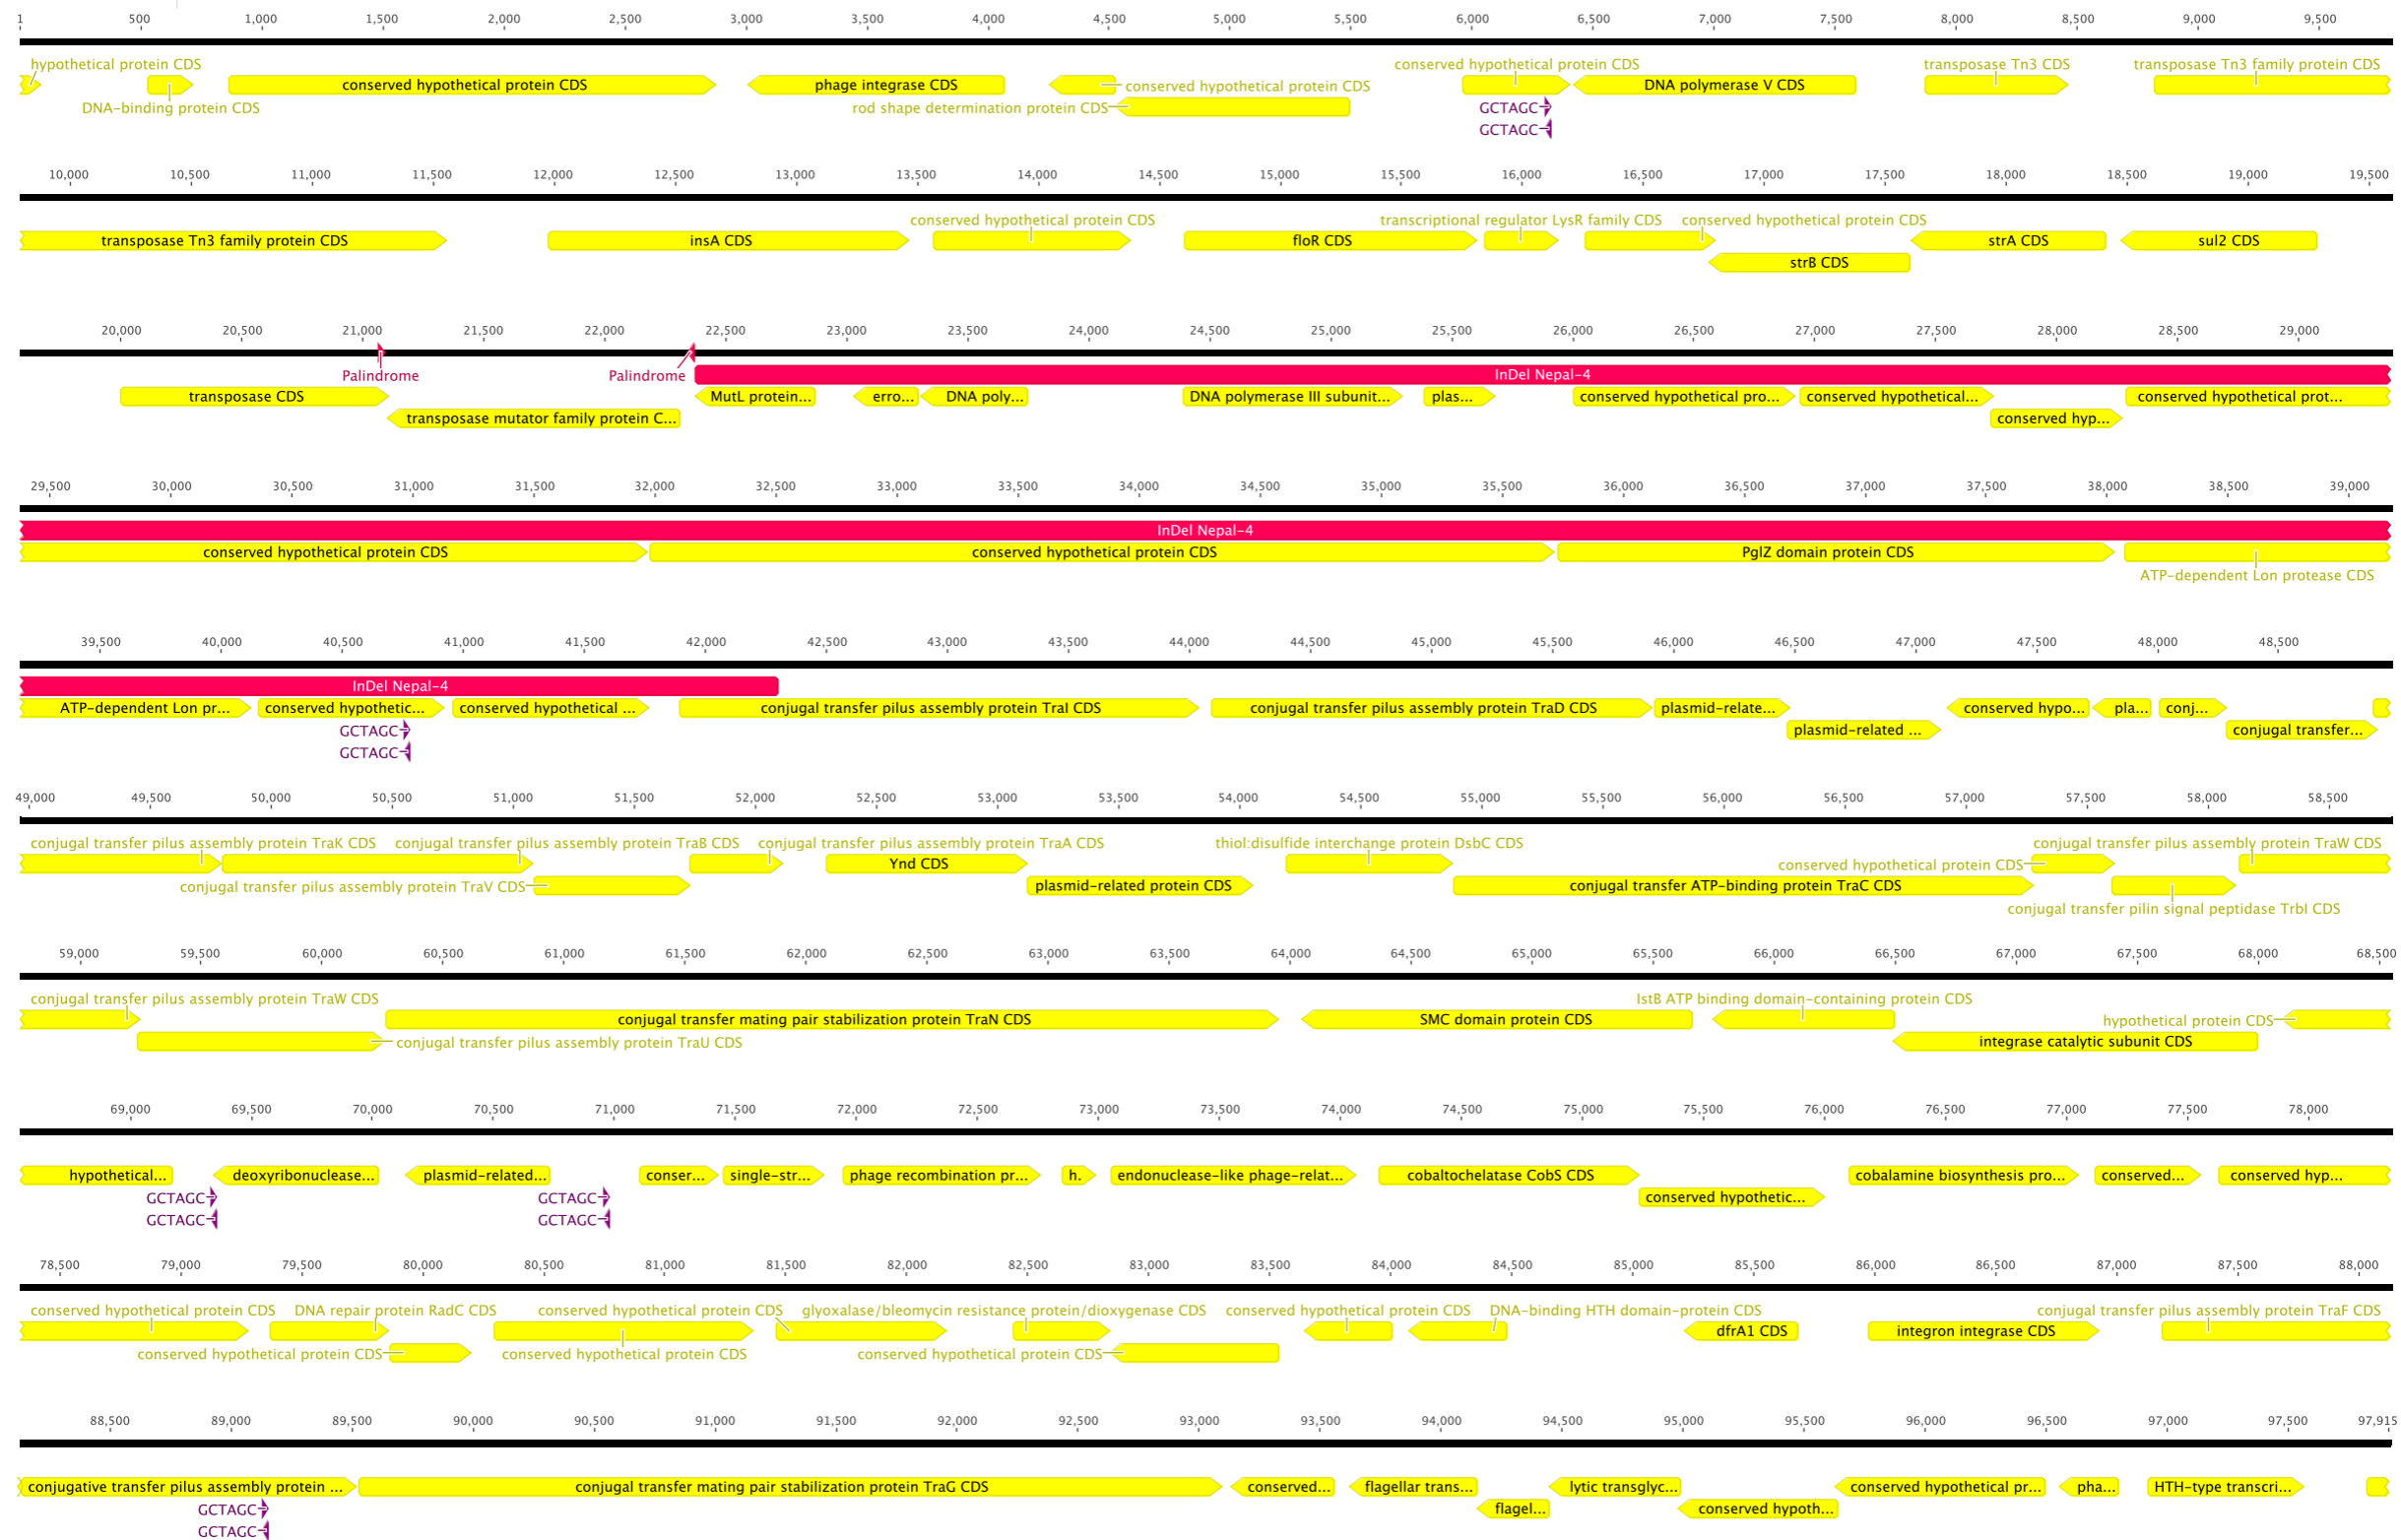

Supplement: mbo006142052sf5.pdf [file mbo006142052sf5.pdf]

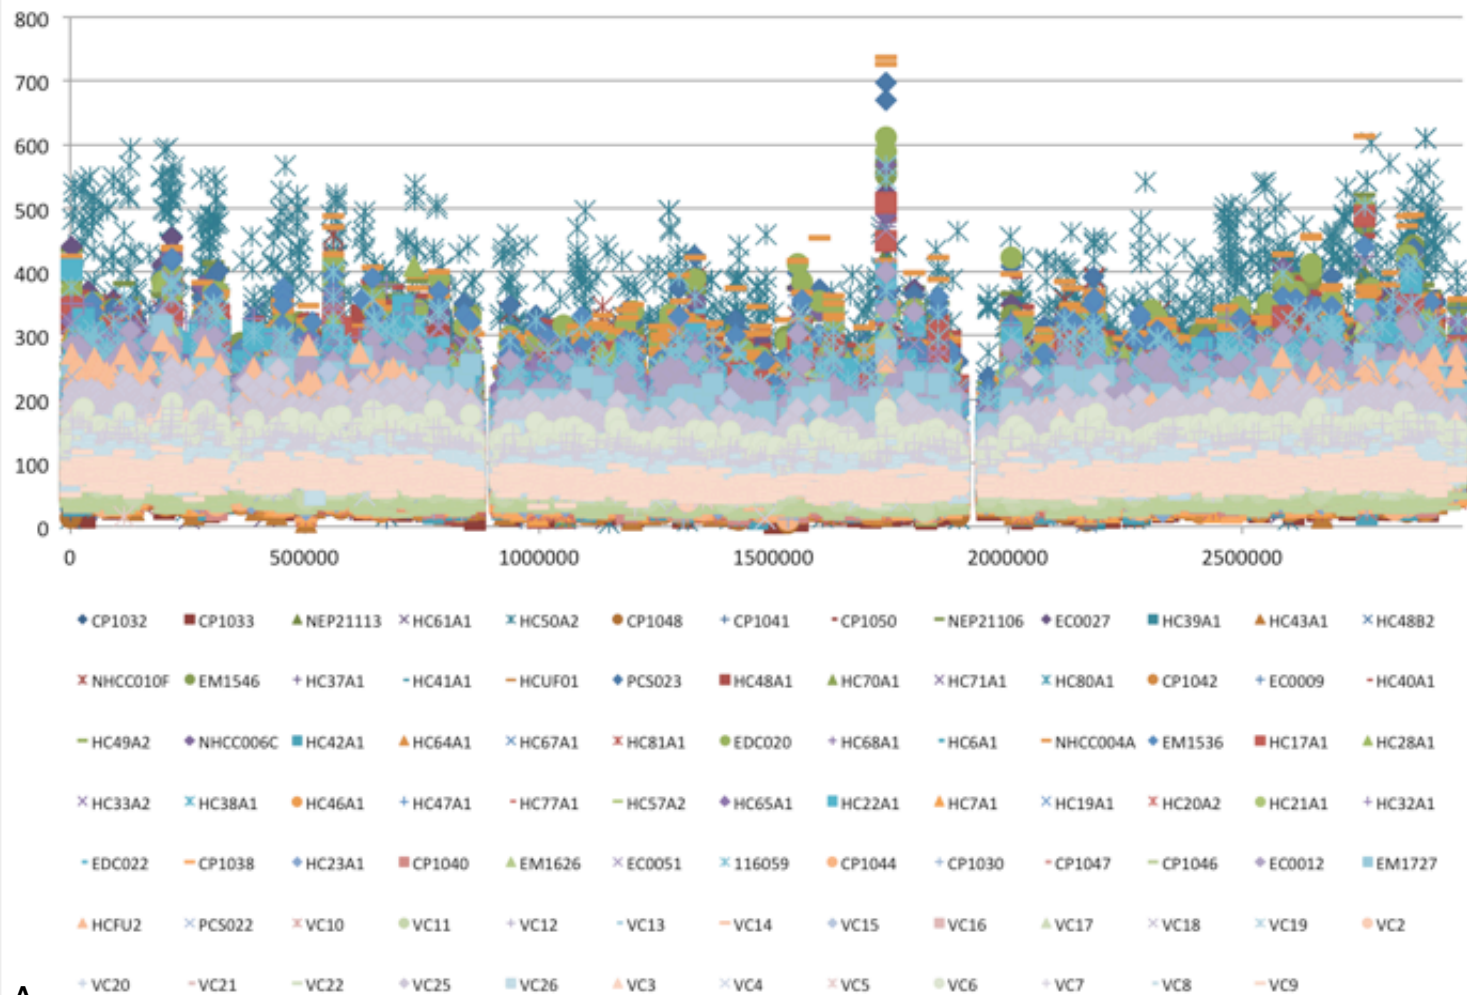

A

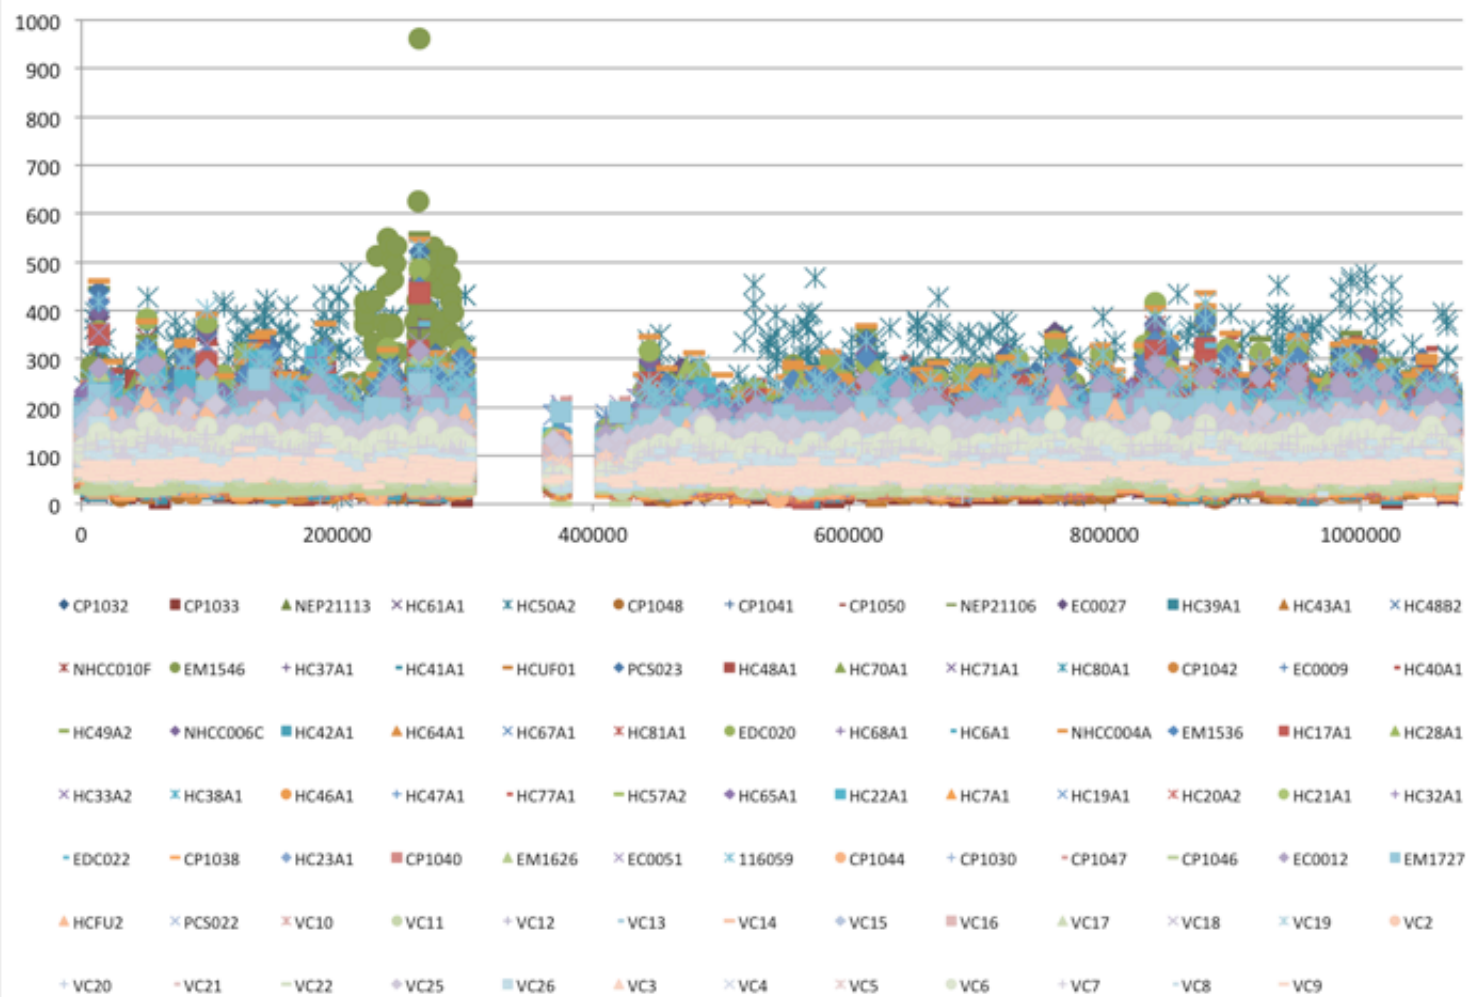

B

Supplement: mbo006142052sf6.pdf [file mbo006142052sf6.pdf]
